# Supplementary material
Source: PubMed Central journal article supplement (PMC2685613)
Supplement: tpc.109.065565_1.pdf [file tpc.109.065565_1.pdf]

Supplemental Data, Reina-Pinto et al., (2009) Misexpression of FATTY ACID ELONGATION1 in the Arabidopsis epidermis induces cell death and suggests a critical role for phospholipase A2 in this process.

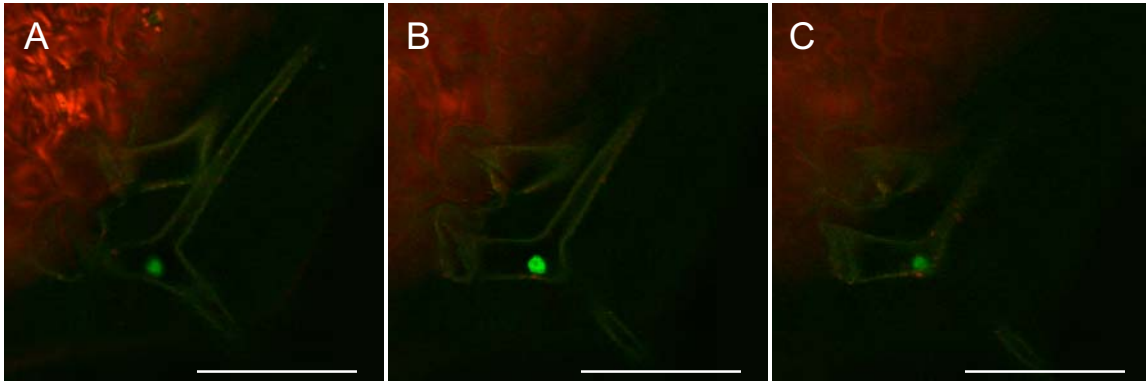

**Supplemental Figure 1.** Localization of the GL2-GFP protein fusion in trichome nuclei in *FDH:FAE1* plants.

This series of optical section images at different locations of the focal plane encompassing a living trichome cell that escapes from the cell death. The images were obtained with a Leica TCS 4D confocal laser scanning microscope. Images (A), (B) and (C) correspond to the beginning, middle, and end, respectively, of the movie of this image series that is available as the Supplemental Movie 1 online.

The green GL2-GFP protein fluorescence is localized within nucleus, and no mislocalization of the GFP signal is detected. Since GFP was fused in-frame with the C-terminus of GL2 under control of the native *GL2* promoter, other cells do not express GL2 at this stage.

Bars are 100  $\mu\text{m}$ .

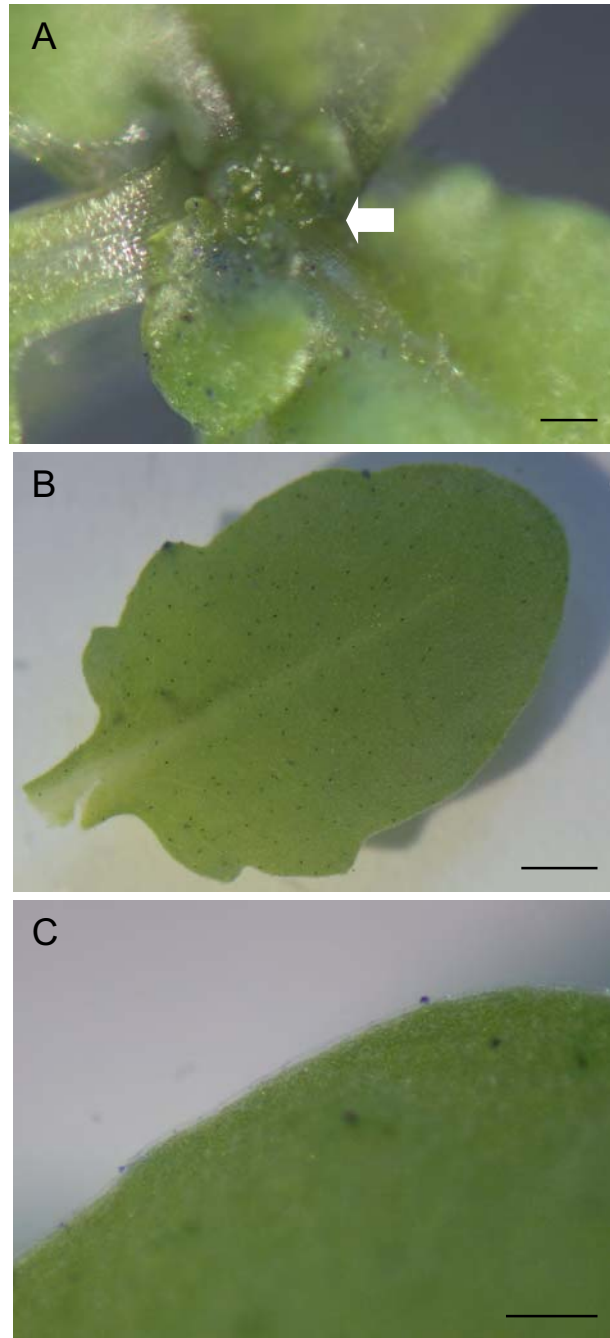

**Supplemental Figure 2.** Toluidine blue staining for cuticular defects in *FDH:FAE1* trichomes.

(A) Newly differentiated trichomes are not stained by toluidine blue (arrow) but more distally located trichomes are not able to exclude the dye as they undergo cell death.

(B) Trichome cell remnants are stained with TB but no increase in overall TB-staining is detected in the *FDH:FAE1* leaves.

(C) Higher-magnification view of a leaf with stained trichomes.

Bars are 250  $\mu\text{m}$  in (A) and (C), and 1000  $\mu\text{m}$  in (B).

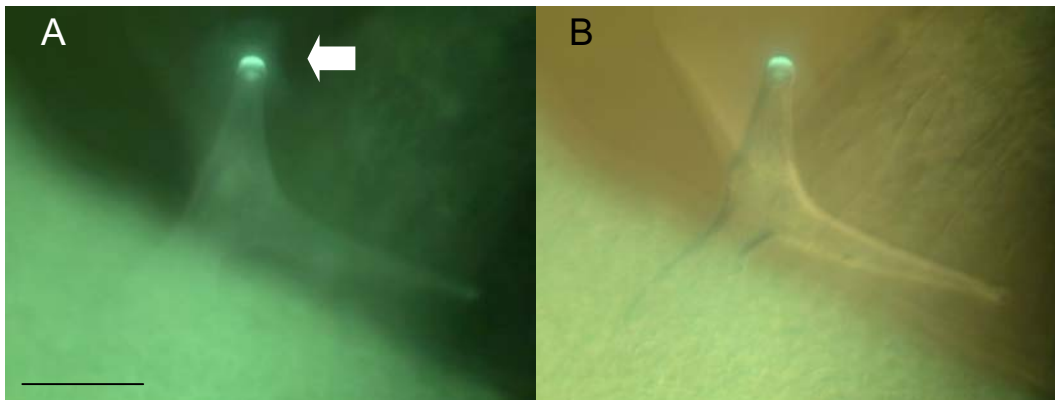

**Supplemental Figure 3.** Aniline blue staining for callose.

To detail the localization of the callose accumulation in the tip of the branch (arrow), the fluorescent image (**A**) shows the aniline blue-stained developing tri-branched trichome under UV-light. This pattern of callose deposition is observed in less-branched or unbranched developing trichomes. The fluorescent and visual-light images were superimposed in (**B**). Bar = 50  $\mu$ m.

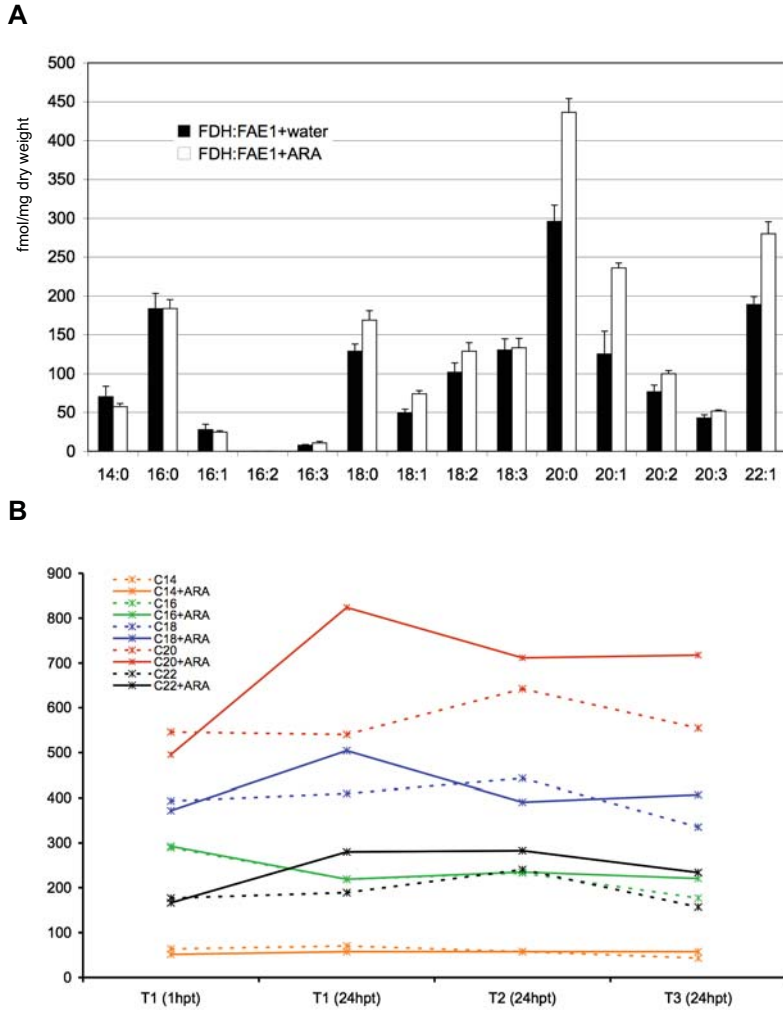

**Supplemental Figure 4.** Effect of aristolochic acid (ARA) treatment on VLCFAs in acyl-CoA esters in *FDH:FAE1* plants.

High-performance liquid chromatography analysis of acyl-CoAs extracted from young rosette leaves (0.5-1.0 cm) and derivatized to fluorescent acyl-*etheno*-CoAs. The four-week-old plants were sprayed prior to analysis either with water or 30  $\mu$ M ARA.

(A) Acyl-CoA profiles 24h post treatment (hpt). Data are mean  $\pm$  SE; n = 5.

(B) Accumulation of VLCFAs in acyl-CoAs in course of treatment with ARA. Treatments T1, T2 and T3 were performed daily for three consecutive days, and tissues for analysis were collected daily 1 hpt or 24 hpt as indicated. Data are summarized for each chain length.

**Supplementary Table 1. Summary data set for compounds tested in the cell death assay**

| Compound                         | Major targets                                              | Action                                      | Range of concentrations                           | Solvent                       | Source                                     | Trichome Recovery? |
|----------------------------------|------------------------------------------------------------|---------------------------------------------|---------------------------------------------------|-------------------------------|--------------------------------------------|--------------------|
| Myriocin                         | Serine palmitoyltransferase                                | Inhibitor                                   | 0.125 and 1 $\mu$ M                               | DMSO or MetOH                 | Biomol, SL-226<br>Alexis, ALX-350-274-M005 | NO                 |
| L-Cycloserine                    | Serine palmitoyltransferase                                | Inhibitor                                   | 20, 30, 40 $\mu$ M                                | Water                         | Sigma, C1159                               | NO                 |
| Fumonisin B1                     | Sphinganine N-acyltransferase                              | Inhibitor                                   | 5, 10 and 15 $\mu$ M                              | MetOH                         | Sigma, F1147                               | NO                 |
| Desipramine hydrochloride        | Sphingomyelinase                                           | Inhibitor                                   | 20, 30, 40 $\mu$ M                                | Water                         | Sigma, D3900                               | NO                 |
| Ceramide 1-phosphate             | Sphingomyelinase; Phospholipase A2(cPLA2)                  | Inhibitor; Activator                        | 5, 10 and 15 $\mu$ M                              | methanol/dodecane (49:1, v/v) | Sigma, C4832                               | NO                 |
| Flufenacet                       | $\beta$ -ketoacyl-CoA synthase                             | Inhibitor                                   | 0.005%                                            | DMSO                          | Gift from Bayer CropScience                | YES                |
| Alachlor                         | $\beta$ -ketoacyl-CoA synthase                             | Inhibitor                                   | 0.005%                                            | DMSO                          | Sigma, 45316                               | YES                |
| D609                             | PC-specific Phospholipase C                                | Inhibitor                                   | 10 and 100 $\mu$ M                                | Water                         | Alexis, ALX-270-089                        | NO                 |
| U73122                           | Phospholipase C                                            | Inhibitor                                   | 10, 20 and 30 $\mu$ M                             | Ethanol                       | TOCRIS Bioscience, 1268                    | NO                 |
| Neomycin sulfate                 | IP-specific Phospholipase C<br>PC-specific Phospholipase D | Inhibitor                                   | 10, 100, 500 $\mu$ M                              | Water                         | Alexis, ALX-380-035                        | NO                 |
| 1-Butanol                        | Phospholipase D                                            | Antagonist                                  | 1, 2, 5% (v/v)                                    | No stock                      | Sigma, 19420                               | NO                 |
| Bromoelanol lactone              | Phospholipase A2                                           | Inhibitor                                   | 10, 20, 30 and 40 $\mu$ M                         | DMSO                          | Sigma, B1552<br>Alexis, ALX 270-195-M005   | YES                |
| Aristolochic acid                | Phospholipase A2                                           | Inhibitor                                   | 10, 20, 30 and 40 $\mu$ M                         | Water                         | Sigma, A9451<br>Alexis, ALX-270-047-M025   | YES                |
| ONO-RS-082                       | Phospholipase A2                                           | Inhibitor                                   | 10, 20 and 30 $\mu$ M                             | DMSO or Ethanol               | Biomol, ST320                              | NO                 |
| PACOCF3                          | Phospholipase A2                                           | Inhibitor                                   | 10, 20, 30 and 40 $\mu$ M                         | DMSO                          | Biomol, ST-336<br>Alexis, ALX—340-019-M010 | NO                 |
| N-acetyl cysteine                | ROS                                                        | ROS scavenger/<br>antioxidant               | 2, 10, 35 and 50 $\mu$ M                          | Water                         | Sigma, A7250                               | NO                 |
| Nordihydroguaiaretic acid (NDGA) | Lipoxygenase (LOX); ROS/intermediates                      | Inhibitor; ROS<br>scavenger<br>/antioxidant | 5, 10, 15 $\mu$ M                                 | DMSO                          | Calbiochem, 479975                         | NO                 |
| Triacsin C                       | Long chain acyl-CoA synthetase                             | Inhibitor                                   | 10, 50, 100 and 500 $\mu$ M                       | DMSO                          | Alomone labs, T-750                        | NO                 |
| Staurosporine                    | Kinases                                                    | Inhibitor                                   | 5-10-15 $\mu$ M                                   | DMSO                          | LC Laboratories, S-9300                    | NO                 |
| GF-19203X                        | Protein Kinase C                                           | Inhibitor                                   | 5, 10, 15, 20, 50 and 100 $\mu$ M                 | DMSO                          | Biomol, E1246                              | NO                 |
| Ilmofosine                       | Protein Kinase C                                           | Inhibitor                                   | 20, 40 and 60 $\mu$ M                             | Water                         | Sigma, I2409-1MG                           | NO                 |
| PKC412                           | Protein kinase C                                           | Inhibitor                                   | 5, 10, 15, 20 and 30 $\mu$ M                      | DMSO                          | LC Laboratories, P-7600                    | NO                 |
| U0126                            | MAPKK (MEK1 and MEK2)                                      | Inhibitor                                   | 1, 10, 100 $\mu$ M                                | DMSO                          | Alomone labs, U-400                        | NO                 |
| R59022                           | Diacylglycerol kinase                                      | Inhibitor                                   | 50, 100 $\mu$ M                                   | DMSO, Ethanol or Ethyl ace    | Sigma, D5919                               | NO                 |
| R59949                           | Diacylglycerol kinase                                      | Inhibitor                                   | 50, 100 $\mu$ M                                   | DMSO, Ethanol or Ethyl ace    | Sigma, D5794                               | NO                 |
| Cantharidin                      | Protein phosphatase 1 and 2A                               | Inhibitor                                   | 20 and 30 $\mu$ M                                 | DMSO                          | Alexis, ALX-270-063-M025                   | NO                 |
| Okadaic acid                     | Protein phosphatase 1 and 2A                               | Inhibitor                                   | 3, 15 and 30 $\mu$ M                              | DMSO                          | Alexis, ALX-350-011-025                    | NO                 |
| Anisomycin                       | Protein synthesis; MAPK and MAPK homologs                  | Inhibitor; Activator                        | 0.1, 10 $\mu$ M                                   | DMSO or Ethanol               | Alomone labs, A-520                        | NO                 |
| Clofibrate                       | PPAR; LPLAT                                                | Agonist; Inhibitor                          | 0.020, 0.010, 0.005,<br>0.0025 and 0.00125% (v/v) | Methanol                      | Sigma, C6643                               | YES                |
| Ciprofibrate                     | PPAR                                                       | Agonist                                     | 10, 50, 100 $\mu$ M                               | DMF                           | Alexis, ALX-270-475-M025                   | NO                 |
| Fenofibrate                      | PPAR                                                       | Agonist                                     | 10, 50, 100 $\mu$ M                               | DMF                           | Alexis, ALX-270-481-G005                   | NO                 |
| Ethephon                         | Ethylene                                                   | Ethylene releasing<br>compound              | 5, 10 and 15 $\mu$ M                              | Water                         | Sigma, C0143                               | NO                 |
